# Supplementary material
Source: publisher figshare collection journal article supplement (https://gsajournals.figshare.com/ndownloader/files/12853532)
Supplement: Supplementary file 1 [file 12853532]

## Sheet: WH clustering
Cluster 1	n=22				Cluster 2	n = 127				Cluster 3	n = 72				Cluster 4	n = 114
Gene Name	Flybase ID	1h-AR v naïve	24h-AR v naïve		Gene Name	Flybase ID	1h-AR v naïve	24h-AR v naïve		Gene Name	Flybase ID	1h-AR v naïve	24h-AR v naïve		Gene Name	Flybase ID	1h-AR v naïve	24h-AR v naïve
klu	FBgn0013469	-1.01736	-0.675834		Act57B	FBgn0000044	-0.0268958	-0.801409		Arr1	FBgn0000120	1.06513	0.541449		Act5C	FBgn0000042	0.698526	0.104023
Clk	FBgn0023076	-1.14629	-0.764786		ds	FBgn0000497	-0.695374	-0.231866		comt	FBgn0000346	0.926919	0.524349		Cam	FBgn0000253	0.682068	0.0608576
CG4928	FBgn0027556	-0.934414	-1.01144		gt	FBgn0001150	-1.00561	-0.301441		Eip71CD	FBgn0000565	1.50168	0.552361		Pka-C1	FBgn0000273	0.296209	-0.228249
CG4666	FBgn0029838	-1.32777	-0.921147		pk	FBgn0003090	-0.61489	-0.142039		Glt	FBgn0001114	1.19499	0.615866		Col4a1	FBgn0000299	0.900312	0.473677
CG9902	FBgn0030757	-1.06401	-0.482113		CG2841	FBgn0003159	-0.569238	-0.380085		l(3)73Ah	FBgn0002283	0.979764	0.761002		Galphao	FBgn0001122	0.497921	0.0692665
CG2839	FBgn0031273	-1.68075	-1.42635		su(w[a])	FBgn0003638	-0.777878	-0.326003		Lsp1beta	FBgn0002563	0.951644	1.01074		mod	FBgn0002780	0.854681	-0.140058
CG9016	FBgn0031751	-1.3132	-1.29915		Tm1	FBgn0003721	-0.460044	-0.384609		RpL36	FBgn0002579	1.35237	0.522571		ninaC	FBgn0002938	0.873471	0.317091
Achl	FBgn0033936	-1.34998	-0.369721		Egfr	FBgn0003731	-0.575585	-0.00161089		per	FBgn0003068	1.0042	0.990577		ninaE	FBgn0002940	0.730298	0.276173
CG4294	FBgn0034742	-1.03054	-0.482071		vap	FBgn0003969	-0.598477	0.121154		Yp3	FBgn0004047	0.449921	1.60886		Pc	FBgn0003042	0.82969	0.384786
CG2765	FBgn0035087	-0.992021	-0.728069		mew	FBgn0004456	-0.570053	-0.271852		gol	FBgn0004919	1.08854	0.566851		Ppn	FBgn0003137	0.610456	0.556193
Indy	FBgn0036816	-0.881974	-0.760327		B52	FBgn0004587	-0.874099	-0.154561		RpS17	FBgn0005533	1.25957	0.406414		Pu	FBgn0003162	0.810597	0.206436
Spn77Bb	FBgn0036969	-1.33104	-1.25851		bab1	FBgn0004870	-0.758478	-0.161686		RpL23	FBgn0010078	0.974231	0.528093		Rh3	FBgn0003249	1.00965	0.39403
CG17018	FBgn0039972	-0.95208	-0.628333		faf	FBgn0005632	-0.392098	0.0106224		Gel	FBgn0010225	1.18396	0.76776		Rop	FBgn0004574	0.980819	0.451186
FASN3	FBgn0040001	-1.08235	-0.943163		bt	FBgn0005666	-0.515326	-0.804273		Dro	FBgn0010388	1.58813	0.75233		svr	FBgn0004648	0.504422	0.0626662
GEFmeso	FBgn0050115	-1.01207	-0.58753		Itp-r83A	FBgn0010051	-0.487733	-0.0395291		RpS9	FBgn0010408	1.51631	0.864823		His3.3B	FBgn0004828	0.82107	0.202223
CG30438	FBgn0050438	-1.35106	-0.771505		hdc	FBgn0010113	-0.422679	-0.223905		Tig	FBgn0011722	1.33537	0.577539		Hrb27C	FBgn0004838	0.450209	-0.140489
CG32436	FBgn0052436	-1.33844	-1.1308		Aldh-III	FBgn0010548	-0.481973	-0.108077		mt:CoIII	FBgn0013676	1.043	0.466493		scrt	FBgn0004880	0.725679	0.090681
CG13164	FBgn0061197	-1.31942	-1.25658		Gug	FBgn0010825	-0.68258	-0.115217		mt:Cyt-b	FBgn0013678	1.03051	0.539446		Ggamma1	FBgn0004921	0.929487	0.201867
sls	FBgn0086906	-0.881107	-1.01278		Tis11	FBgn0011837	-0.541599	-0.280717		mt:ND1	FBgn0013679	2.00508	0.710329		eIF2beta	FBgn0004926	0.959274	0.330188
bru2	FBgn0262475	-1.1649	-0.640456		shot	FBgn0013733	-0.662143	-0.172294		mt:ND5	FBgn0013684	1.81888	0.671882		Nmdmc	FBgn0010222	0.738697	0.323888
CG17646	FBgn0264494	-0.947593	-0.667939		Tie	FBgn0014073	-0.76781	-0.161912		mt:lrRNA	FBgn0013686	0.935261	0.702858		Ssrp	FBgn0010278	0.813756	0.318273
IP3K2	FBgn0266375	-1.31116	-0.231821		jumu	FBgn0015396	-0.592586	-0.439099		mt:srRNA	FBgn0013688	0.866433	0.77902		sinu	FBgn0010894	0.530725	0.362116
					fry	FBgn0016081	-0.762224	-0.0384019		Sr-CI	FBgn0014033	1.35347	0.670303		nSyb	FBgn0013342	0.812021	0.144981
					Pitslre	FBgn0016696	-0.805858	-0.308674		tim	FBgn0014396	1.21127	1.01906		mt:CoI	FBgn0013674	0.965749	0.12089
					RhoGEF2	FBgn0023172	-0.727464	-0.267998		cype	FBgn0015031	1.24329	0.423581		Rab2	FBgn0014009	0.817921	-0.0229047
					fus	FBgn0023441	-0.748892	-0.180754		vri	FBgn0016076	1.71042	1.13825		Hydr2	FBgn0014906	0.781767	-0.15104
					Dbp80	FBgn0024804	-0.699584	-0.165507		Ser7	FBgn0019929	1.01302	0.587621		Ubc4	FBgn0015321	0.906617	0.253462
					bab2	FBgn0025525	-0.55701	-0.337926		Rh6	FBgn0019940	1.33203	0.394509		alpha-Est8	FBgn0015576	0.688198	-0.0612658
					eIF5B	FBgn0026259	-0.413256	-0.147033		Inos	FBgn0025885	0.757193	0.742149		Rab6	FBgn0015797	0.924525	0.208302
					Amph	FBgn0027356	-0.670391	-0.19037		Ubc10	FBgn0026316	1.33964	0.245402		vkg	FBgn0016075	0.765116	0.422714
					CG8740	FBgn0027585	-0.756712	-0.176628		CG5991	FBgn0026576	1.27876	0.429111		Pdp1	FBgn0016694	0.994082	0.326711
					cindr	FBgn0027598	-0.54998	-0.025495		AlaRS	FBgn0027094	0.98214	0.52328		Rab1	FBgn0016700	0.956217	0.1136
					Ythdc1	FBgn0027616	-0.81655	-0.154692		ppl	FBgn0027945	1.47795	0.967068		qm	FBgn0019662	0.688245	0.165095
					blot	FBgn0027660	-0.784869	-0.233483		CG2233	FBgn0029990	1.22726	0.964561		14-3-3epsilon	FBgn0020238	0.872227	0.0564702
					CG9776	FBgn0027866	-0.519779	-0.382321		CG1468	FBgn0030157	1.50601	0.68427		Reph	FBgn0021800	0.699559	-0.00738632
					lqf	FBgn0028582	-0.459707	-0.221687		CG2145	FBgn0030251	0.969261	0.763902		qkr58E-2	FBgn0022985	0.955985	0.0186359
					aralar1	FBgn0028646	-0.637057	-0.0683157		Pis	FBgn0030670	1.22548	0.588704		teq	FBgn0023479	0.778263	0.634991
					CG14431	FBgn0029922	-0.653957	-0.136826		CG9917	FBgn0030740	1.24044	0.509292		PRL-1	FBgn0024734	0.652981	0.0833707
					hiw	FBgn0030600	-0.220043	0.224197		IM33	FBgn0031561	1.34278	0.851479		RSG7	FBgn0024941	0.825416	0.0789058
					CG8184	FBgn0030674	-0.5324	0.118548		CG14274	FBgn0032023	0.965863	0.488416		santa-maria	FBgn0025697	0.646304	0.0542756
					Wdr62	FBgn0031374	-0.731901	-0.271369		TBC1D16	FBgn0032249	1.10708	0.51591		Idgf4	FBgn0026415	0.846648	0.320188
					cdc14	FBgn0031952	-0.505182	-0.208984		CG7299	FBgn0032282	1.23675	0.917187		Eaat1	FBgn0026439	0.275307	0.405354
					Samuel	FBgn0032330	-0.688559	-0.473956		CG17108	FBgn0032285	0.853707	0.861987		miple1	FBgn0027111	0.918412	0.125639
					MRP	FBgn0032456	-0.841052	-0.198363		CG9928	FBgn0032472	1.61625	0.562177		CG1927	FBgn0027547	1.02248	0.28205
					CG11665	FBgn0033028	-0.536535	0.118625		CG16772	FBgn0032835	1.31157	0.443413		Vps4	FBgn0027605	0.81932	0.0789466
					ACC	FBgn0033246	-0.754549	0.153753		CG11211	FBgn0033067	1.27853	0.703552		jdp	FBgn0027654	0.719825	0.14079
					Cirl	FBgn0033313	-0.608849	-0.199064		IM23	FBgn0034328	1.54771	1.19415		REG	FBgn0029133	0.85243	0.1462
					Sec31	FBgn0033339	-0.664447	-0.0930861		GNBP-like3	FBgn0034511	1.26081	0.559426		ATP7	FBgn0030343	0.83	0.317166
					CG13954	FBgn0033405	-0.901875	-0.21426		CG18067	FBgn0034512	1.45683	0.607556		CG11138	FBgn0030400	0.528303	-0.307671
					KCNQ	FBgn0033494	-0.842849	-0.376667		CG3088	FBgn0036015	1.22022	0.69929		CG3812	FBgn0030421	0.65957	0.310963
					Dyb	FBgn0033739	-0.665366	-0.0241151		atk	FBgn0036995	0.892728	0.599179		CG8289	FBgn0030854	0.87753	0.464762
					mrj	FBgn0034091	-0.457577	-0.0680232		Spn88Eb	FBgn0038299	1.51934	0.612729		IA-2	FBgn0031294	0.630108	0.300303
					CG10737	FBgn0034420	-0.664408	-0.207924		CG5778	FBgn0038930	1.85778	0.764556		CG4577	FBgn0031306	0.757073	0.2529
					CG8929	FBgn0034504	-0.862781	0.221866		CG7016	FBgn0039238	1.14927	0.44081		Cyp4d21	FBgn0031925	1.00596	0.362549
					p130CAS	FBgn0035101	-0.594904	-0.232356		Obp99c	FBgn0039682	1.67685	0.942894		CG14277	FBgn0032008	0.975885	-0.599341
					CG7971	FBgn0035253	-0.730446	-0.195537		Npc2h	FBgn0039801	1.36129	0.693502		CG7781	FBgn0032021	0.604349	-0.0140271
					CG14995	FBgn0035497	-0.894074	-0.419804		CG8343	FBgn0040502	1.33245	0.611428		Apoltp	FBgn0032136	0.809703	0.487053
					CG1316	FBgn0035526	-0.640416	-0.352958		IM4	FBgn0040653	2.37514	1.24629		CG5676	FBgn0032200	0.997188	0.384761
					Pura	FBgn0035802	-0.525249	-0.355563		IM3	FBgn0040736	1.96514	1.09506		GATAd	FBgn0032223	0.589912	0.096606
					CG4080	FBgn0035983	-0.620528	-0.29768		CG7630	FBgn0040793	1.16669	0.479116		CG5758	FBgn0032666	0.482279	-0.220985
					nudE	FBgn0036059	0.0302533	-0.476286		Nplp2	FBgn0040813	1.5949	0.685255		sNPF	FBgn0032840	0.559876	0.0187204
					bmm	FBgn0036449	-0.907115	-0.237492		PGRP-SB1	FBgn0043578	1.48324	0.137252		Lamp1	FBgn0032949	0.63183	0.0118128
					Cpr76Bc	FBgn0036880	-1.04932	-0.123994		Gclm	FBgn0046114	1.06919	0.598087		jef	FBgn0033958	0.741833	0.062792
					RhoBTB	FBgn0036980	-0.582329	-0.132667		Adi1	FBgn0052068	1.12264	0.436242		Mapmodulin	FBgn0034282	0.47466	-0.0779785
					CG8312	FBgn0037720	-0.622173	-0.415625		LeuRS	FBgn0053123	0.968054	0.689597		EndoB	FBgn0034433	0.662521	0.210363
					CG7518	FBgn0038108	-0.607117	0.146273		CG33493	FBgn0053493	1.20424	0.918972		Toll-7	FBgn0034476	0.545015	0.0572563
					foxo	FBgn0038197	-0.721381	-0.42855		Kaz1-ORFB	FBgn0063923	1.11352	0.351281		ND-B12	FBgn0034645	0.972925	0.333524
					CG7720	FBgn0038652	-0.788694	-0.22184		CG34166	FBgn0085195	1.31029	0.919016		CG11388	FBgn0034959	0.786749	-0.269363
					puf	FBgn0039214	-0.553593	0.332757		CG34227	FBgn0085256	1.68753	1.31926		ITP	FBgn0035023	0.72983	0.147371
					CG1646	FBgn0039600	-0.577018	-0.0974185		alphaSnap	FBgn0250791	1.45899	0.704585		CG12025	FBgn0035285	0.648841	0.199674
					CG30015	FBgn0050015	-0.577627	-0.110506		Cpn	FBgn0261714	0.945606	0.511385		CG14989	FBgn0035495	0.844569	0.185348
					CG30463	FBgn0050463	-0.738252	-0.309902		Pal2	FBgn0262728	1.10235	0.392123		CG15021	FBgn0035544	0.855867	0.0252568
					CG31522	FBgn0051522	-0.469996	-0.287359							Cyt-c1	FBgn0035600	1.03106	0.137427
					gw	FBgn0051992	-0.411394	-0.0406747							CG4911	FBgn0035959	0.519437	0.0563348
					CG31999	FBgn0051999	-0.596008	-0.221677							Syx13	FBgn0036341	0.459095	-0.375429
					Mrtf	FBgn0052296	-0.583192	-0.154015							Toll-6	FBgn0036494	0.527817	0.399894
					ZAP3	FBgn0052685	-0.3431	0.0449229							Gabat	FBgn0036927	1.05323	0.232102
					dpy	FBgn0053196	-0.698819	-0.365808							CG9636	FBgn0037556	0.846922	0.109023
					PNUTS	FBgn0053526	-0.836585	-0.155076							ATP6AP2	FBgn0037671	0.69484	0.261792
					form3	FBgn0053556	-0.487767	0.0343556							Gnmt	FBgn0038074	0.995789	-0.100641
					LpR1	FBgn0066101	-0.86041	-0.427424							CG9813	FBgn0038143	0.818814	0.281157
					side-VI	FBgn0083950	-0.65884	-0.335314							Irc	FBgn0038465	0.710654	0.613415
					CG34126	FBgn0083962	-0.548073	0.0110214							CG7708	FBgn0038641	0.915406	0.464801
					Shroom	FBgn0085408	-0.806289	-0.503802							EndoA	FBgn0038659	0.62454	0.164278
					CG34408	FBgn0085437	-0.964652	-0.300913							CG6656	FBgn0038912	0.731934	0.280896
					NKAIN	FBgn0085442	-0.522591	-0.120079							CG11791	FBgn0039266	0.483131	-0.778055
					CG34417	FBgn0085446	-0.353852	-0.400067							Tsp97E	FBgn0039465	0.606492	-0.0338664
					CG41378	FBgn0085638	-0.528316	-0.145926							Fis1	FBgn0039969	0.960167	0.424673
					Invadolysin	FBgn0086359	-0.789256	-0.280622							CG6503	FBgn0040606	0.940394	-0.16614
					cv-c	FBgn0086901	-0.80647	-0.154699							CG14767	FBgn0040777	0.739028	0.1373
					bbg	FBgn0087007	-0.856229	-0.313385							AttB	FBgn0041581	1.171	0.13349
					DCX-EMAP	FBgn0259099	-0.841777	-0.253855							Cpr65Au	FBgn0042119	0.622883	-0.00559996
					CG42389	FBgn0259735	-0.432482	-0.177448							CG4747	FBgn0043456	0.590152	0.0274733
					Su(var)3-3	FBgn0260397	-0.890942	-0.241426							CG17278	FBgn0046763	0.962063	0.0849903
					CG12163	FBgn0260462	-0.882087	-0.184646							Obp49a	FBgn0050052	1.18363	-0.173311
					par-1	FBgn0260934	-0.442641	-0.279305							lncRNA:CR31451	FBgn0051451	0.832448	0.465749
					app	FBgn0260941	-0.669994	-0.257891							ltl	FBgn0052372	0.946679	0.284122
					dpr21	FBgn0260995	-0.699726	-0.197013							GlcT	FBgn0067102	0.768874	0.470949
					mgl	FBgn0261260	-0.5093	-0.100724							AsnRS	FBgn0086443	0.905635	0.37778
					RhoGAP18B	FBgn0261461	-0.824688	-0.310231							jeb	FBgn0086677	1.00087	0.0717077
					prage	FBgn0261548	-0.928861	-0.430864							Jabba	FBgn0259682	0.760774	0.469966
					CG42668	FBgn0261550	-0.453744	-0.110407							Sec22	FBgn0260855	0.769773	0.201397
					Lmpt	FBgn0261565	-0.708681	-0.373309							Vmat	FBgn0260964	0.83937	0.0850096
					tobi	FBgn0261575	-1.07156	0.578488							fwe	FBgn0261722	0.459038	-0.128518
					CG42724	FBgn0261641	-0.912266	-0.206147							LanB1	FBgn0261800	0.791363	0.090413
					tweek	FBgn0261671	-0.596523	0.0498811							dtn	FBgn0262730	0.510869	-0.0818172
					Asx	FBgn0261823	-0.423459	-0.126407							norpA	FBgn0262738	0.527773	0.041387
					Msp300	FBgn0261836	-0.657651	-0.287372							AP-2mu	FBgn0263351	0.844599	0.425928
					whd	FBgn0261862	-0.550328	-0.100636							Slob	FBgn0264087	0.923356	0.22346
					lncRNA:CR42862	FBgn0262109	-0.959274	-0.267179							cv-d	FBgn0265048	0.742558	0.231492
					Ect4	FBgn0262579	-0.45038	-0.203455							CG44247	FBgn0265182	0.857635	0.332968
					axo	FBgn0262870	-0.622703	0.00472784							Ric	FBgn0265605	0.86632	0.139085
					lncRNA:let7C	FBgn0263049	-0.798534	-0.340481							CG45050	FBgn0266410	0.325479	-0.281163
					CG43367	FBgn0263110	-0.592864	-0.0214074							chp	FBgn0267435	0.808989	0.417283
					scrib	FBgn0263289	-0.603792	-0.162354
					mld	FBgn0263490	-0.590882	-0.291131
					CG43693	FBgn0263776	-0.851389	-0.0553392
					CG17684	FBgn0263780	-0.587896	-0.188549
					jvl	FBgn0263929	-0.678134	-0.267084
					Mhc	FBgn0264695	-0.424182	-0.857894
					Pcf11	FBgn0264962	-0.697417	-0.148193
					mbl	FBgn0265487	-0.622397	-0.318197
					Smr	FBgn0265523	-0.399064	-0.171423
					Zasp52	FBgn0265991	-0.759064	-0.569025
					sima	FBgn0266411	-0.634395	-0.21208
					Svil	FBgn0266696	-0.720539	-0.223906
					CG45782	FBgn0267429	-0.834314	-0.296055

## Sheet: MB clustering
Cluster 1	n = 30				Cluster 2	n = 2				Cluster 3	n =13				Cluster 4	n = 120				Cluster 5	n = 174
Gene Name	Flybase ID	1h-AR v naïve	24h-AR v naïve		Gene Name	Flybase ID	1h-AR v naïve	24h-AR v naïve		Gene Name	Flybase ID	1h-AR v naïve	24h-AR v naïve		Gene Name	Flybase ID	1h-AR v naïve	24h-AR v naïve		Gene Name	Flybase ID	1h-AR v naïve	24h-AR v naïve
c(3)G	FBgn0000246	-0.208522	0.531638		whe	FBgn0031176	-3.84556	-3.29329		Ebp	FBgn0004181	-2.23496	-1.60617		by	FBgn0000244	-0.747772	0.0276787		Hr3	FBgn0000448	1.0888	0.387585
lz	FBgn0002576	-0.843638	0.486986		CG16826	FBgn0032505	-6.36291	-3.80593		Mst57Da	FBgn0011668	-2.01638	-1.52253		Cat	FBgn0000261	-1.26154	-0.364015		Dro	FBgn0010388	1.0722	0.486943
Yp1	FBgn0004045	-0.063974	1.33509							lcs	FBgn0028583	-2.5269	-2.2314		eEF1alpha1	FBgn0000556	-0.685303	0.000544998		jeb	FBgn0086677	1.05941	0.232145
ogre	FBgn0004646	-0.562433	0.156065							CG3124	FBgn0034840	-1.56686	-1.43933		eEF2	FBgn0000559	-0.745957	-0.17976		Pzl	FBgn0267430	1.03064	0.0163741
Hf	FBgn0014000	-0.657675	0.750907							CG7910	FBgn0037547	-2.21966	-1.96946		Eip74EF	FBgn0000567	-0.394415	-0.0886602		Rbp1-like	FBgn0030479	0.941855	0.342726
Spat	FBgn0014031	-0.976573	0.402318							CG4836	FBgn0038762	-2.28362	-1.86202		Eno	FBgn0000579	-0.784897	-0.367732		CG7222	FBgn0033551	0.940937	0.307728
Paics	FBgn0020513	-0.74838	0.326917							CG17376	FBgn0042189	-2.14951	-1.66553		Gapdh1	FBgn0001091	-0.987005	-0.551756		CG11317	FBgn0039816	0.931605	0.400336
aft	FBgn0026309	-0.432867	0.655872							FASN2	FBgn0042627	-2.66448	-1.94193		Hsp83	FBgn0001233	-0.490957	-0.291642		CG12605	FBgn0035481	0.921522	0.377479
Patsas	FBgn0029137	-0.535124	0.290446							Ppi1	FBgn0051025	-2.16579	-1.90335		Idh	FBgn0001248	-0.924063	-0.220515		CG31324	FBgn0051324	0.903865	0.318072
CG5877	FBgn0030625	-0.33175	0.504561							CG31198	FBgn0051198	-2.55004	-2.54437		hyd	FBgn0002431	-0.426964	-0.13592		Hr38	FBgn0014859	0.884608	0.135144
Ing3	FBgn0030945	-0.376892	0.516718							CG33340	FBgn0053340	-1.69654	-1.64719		RpL32	FBgn0002626	-0.699764	0.0363609		CG31191	FBgn0051191	0.870962	0.267559
Cyp309a1	FBgn0031432	-1.02245	0.618748							CG17097	FBgn0265264	-2.27415	-1.53783		Men	FBgn0002719	-0.90477	0.0286015		CG2865	FBgn0023526	0.864495	0.205573
Mon1	FBgn0031640	-0.456316	0.524156							CG45080	FBgn0266455	-1.87448	-1.59349		pk	FBgn0003090	-0.723247	0.00644619		lolal	FBgn0022238	0.842715	0.400542
mRpL28	FBgn0031660	-0.17752	0.233637												ref(2)P	FBgn0003231	-0.904745	-0.287458		Ubc6	FBgn0004436	0.841761	0.272385
CG11236	FBgn0031860	-0.226785	0.813487												sev	FBgn0003366	-0.860212	-0.100001		rudhira	FBgn0266019	0.836293	0.332622
Spn28Dc	FBgn0031973	-0.534397	0.278433												alphaTub84B	FBgn0003884	-0.773899	-0.309478		Nplp2	FBgn0040813	0.836068	0.444515
CG5853	FBgn0032167	-0.693419	0.774578												RpL40	FBgn0003941	-1.24546	-0.267961		CkIalpha	FBgn0015024	0.808345	0.350602
CG7456	FBgn0032258	0.037838	0.829689												kst	FBgn0004167	-0.524374	-0.330396		CG11138	FBgn0030400	0.806046	0.508821
CG10495	FBgn0032750	-0.490883	0.374995												mew	FBgn0004456	-0.660041	-0.401267		Hrb27C	FBgn0004838	0.805043	0.256628
CG7997	FBgn0034117	-0.939333	0.525985												Hnf4	FBgn0004914	-0.600867	-0.209049		p120ctn	FBgn0260799	0.804832	0.211844
RpL18	FBgn0035753	-0.508574	0.243733												Acon	FBgn0010100	-0.708977	-0.341977		14-3-3epsilon	FBgn0020238	0.802711	0.318607
Pbp95	FBgn0037540	-0.411212	0.606586												ATPsynbeta	FBgn0010217	-0.775844	-0.512481		Pur-alpha	FBgn0022361	0.793969	0.28629
CG7705	FBgn0038639	-0.513435	0.373904												Nc73EF	FBgn0010352	-0.425732	-0.174404		DopEcR	FBgn0035538	0.789781	0.218751
CG15695	FBgn0038832	-0.97979	0.306418												Aldh-III	FBgn0010548	-0.75657	-0.135384		Syngr	FBgn0033876	0.781386	0.174127
p115	FBgn0040087	-0.255185	0.58464												blw	FBgn0011211	-0.995107	-0.521881		qm	FBgn0019662	0.775486	0.259031
CG32032	FBgn0043806	-0.482253	0.649714												twin	FBgn0011725	-0.913427	-0.351872		CG4612	FBgn0035016	0.771406	0.468119
CG33120	FBgn0053120	-0.465956	0.782661												AcCoAS	FBgn0012034	-0.695215	0.104337		scrt	FBgn0004880	0.765396	0.284741
CG34376	FBgn0085405	-0.472034	0.243203												Gp150	FBgn0013272	-0.513081	0.0278774		ctp	FBgn0011760	0.755333	0.251811
CG42663	FBgn0261545	-0.449605	0.155648												Hsp70Bb	FBgn0013278	-0.653361	-0.336742		His2Av	FBgn0001197	0.75426	0.184358
Sec5	FBgn0266670	-0.380595	0.25263												RpL11	FBgn0013325	-0.840154	-0.139174		CG4911	FBgn0035959	0.751878	0.238758
															Cp1	FBgn0013770	-0.859083	-0.257607		Cam	FBgn0000253	0.751618	0.36847
															RpL7A	FBgn0014026	-0.829333	-0.0103383		Nep3	FBgn0031081	0.750833	0.253787
															Vha26	FBgn0015324	-0.706616	-0.208366		CG14440	FBgn0029894	0.750319	0.4872
															alpha-Est7	FBgn0015575	-0.988148	-0.034349		sr	FBgn0003499	0.744201	0.100171
															Cpr	FBgn0015623	-1.57424	-0.566039		Trf2	FBgn0261793	0.737917	0.320602
															Msr-110	FBgn0015766	-0.502061	-0.0793832		HnRNP-K	FBgn0267791	0.728887	0.205886
															nrv1	FBgn0015776	-0.552175	-0.169682		Mapmodulin	FBgn0034282	0.728756	0.18215
															fry	FBgn0016081	-0.915801	-0.263834		CG5098	FBgn0034300	0.724222	0.215989
															ATPsyngamma	FBgn0020235	-0.854829	-0.317926		Pdp1	FBgn0016694	0.720697	0.4967
															ATPCL	FBgn0020236	-0.848506	-0.139596		CG10543	FBgn0034570	0.717862	0.157577
															Alas	FBgn0020764	-0.870436	-0.534817		Rab2	FBgn0014009	0.712798	0.206339
															Gpo1	FBgn0022160	-0.687231	-0.465249		CG34401	FBgn0085430	0.711495	0.324377
															Tsf1	FBgn0022355	-1.18697	0.0605749		norpA	FBgn0262738	0.70546	0.238415
															fus	FBgn0023441	-0.730665	0.0861319		CkIIbeta	FBgn0000259	0.698813	0.225754
															CG17896	FBgn0023537	-0.908784	-0.163876		SIFaR	FBgn0038880	0.695755	0.185166
															Sodh-1	FBgn0024289	-1.16052	-0.298552		Mnt	FBgn0023215	0.690362	0.190149
															Mipp1	FBgn0026061	-0.768295	-0.256787		CG7708	FBgn0038641	0.683489	0.194493
															Gmap	FBgn0027287	-0.852608	-0.164374		His3.3B	FBgn0004828	0.683094	0.32239
															Amph	FBgn0027356	-0.75234	-0.227065		fne	FBgn0086675	0.667289	0.277398
															Tps1	FBgn0027560	-1.67669	-0.122159		mamo	FBgn0267033	0.665324	0.168721
															FASN1	FBgn0027571	-0.873981	0.0885715		vib	FBgn0262468	0.661694	0.117202
															CG8740	FBgn0027585	-0.47533	-0.295591		Unr	FBgn0263352	0.661635	0.271725
															GstE12	FBgn0027590	-1.00286	-0.153961		mt:ND1	FBgn0013679	0.66025	0.241166
															Non1	FBgn0028473	-0.640878	-0.386183		mei-P26	FBgn0026206	0.653657	0.263928
															lqf	FBgn0028582	-0.451067	-0.16038		side-II	FBgn0259213	0.653361	0.157863
															eEF1gamma	FBgn0029176	-0.999631	-0.281871		Hex-A	FBgn0001186	0.652974	0.255847
															Tsp42Ee	FBgn0029506	-0.678783	-0.276436		CG33181	FBgn0053181	0.648604	0.204559
															CG1640	FBgn0030478	-0.557174	-0.0695451		trv	FBgn0085391	0.645413	0.210139
															ND-51	FBgn0031771	-0.778607	-0.141991		Reph	FBgn0021800	0.643473	0.410071
															Oatp30B	FBgn0032123	-0.505319	-0.047161		Sh	FBgn0003380	0.639364	0.104212
															CG17549	FBgn0032774	-0.853368	-0.455831		Gbeta13F	FBgn0001105	0.636754	0.213508
															ACC	FBgn0033246	-0.777282	-0.0480412		Vap33	FBgn0029687	0.636385	0.275509
															RpS23	FBgn0033912	-1.04148	-0.252558		Eip93F	FBgn0264490	0.631142	0.234217
															Arc1	FBgn0033926	-1.03454	-0.137897		Spred	FBgn0020767	0.628556	0.241525
															ASPP	FBgn0034606	-0.495991	-0.096605		Rbp6	FBgn0260943	0.623344	0.296236
															CG9812	FBgn0034860	-1.0067	-0.279346		dsh	FBgn0000499	0.620378	0.358726
															eEF5	FBgn0034967	-0.717024	-0.276065		CG5065	FBgn0034145	0.617077	-0.105449
															CG2765	FBgn0035087	-0.996547	-0.409126		dysc	FBgn0264006	0.615146	0.224253
															CG14995	FBgn0035497	-0.717115	-0.187962		Pkc98E	FBgn0003093	0.61482	0.235758
															SP1173	FBgn0035710	-0.599877	-0.418523		Pde9	FBgn0259171	0.610805	0.267084
															CG4080	FBgn0035983	-0.390353	-0.158294		bol	FBgn0011206	0.605459	0.179837
															CG6910	FBgn0036262	-0.879642	-0.29257		CG32204	FBgn0052204	0.604302	-0.032266
															bmm	FBgn0036449	-1.46337	-0.278639		Syt4	FBgn0028400	0.60381	0.06333
															CG3764	FBgn0036684	-0.440202	-0.137503		CG44247	FBgn0265182	0.598251	0.285761
															CG3902	FBgn0036824	-0.654215	-0.0558861		kek1	FBgn0015399	0.596263	0.166152
															CG9449	FBgn0036875	-1.07252	0.102183		CG14989	FBgn0035495	0.594681	0.235762
															CG13318	FBgn0037627	-0.89116	0.218882		Galphaq	FBgn0004435	0.594395	0.199313
															skap	FBgn0037643	-0.652637	-0.166209		Top1	FBgn0004924	0.592834	0.182329
															CG6574	FBgn0037846	-0.719798	0.0341235		g	FBgn0001087	0.588131	0.12073
															CG7518	FBgn0038108	-0.541195	-0.133016		Naa30A	FBgn0024362	0.586948	0.0930362
															foxo	FBgn0038197	-0.67193	-0.103643		CG8500	FBgn0037754	0.58648	0.264263
															RpL27	FBgn0039359	-0.844049	-0.0311958		CG17816	FBgn0037525	0.576718	-0.0125477
															wat	FBgn0039620	-0.624566	-0.251971		nAChRalpha6	FBgn0032151	0.575878	0.079738
															CG7920	FBgn0039737	-0.754626	-0.393317		nSyb	FBgn0013342	0.568642	0.275043
															RpS7	FBgn0039757	-0.999487	-0.0539515		AGO1	FBgn0262739	0.568565	0.157784
															FASN3	FBgn0040001	-1.19224	-0.957771		hec	FBgn0030437	0.560344	0.0220265
															CG5273	FBgn0040382	-0.808684	-0.181426		Topors	FBgn0267351	0.559591	0.106551
															Tep4	FBgn0041180	-0.825111	-0.0884944		Akap200	FBgn0027932	0.554819	0.215613
															CG32444	FBgn0043783	-1.19289	-0.215772		CG5830	FBgn0036556	0.553562	0.199976
															vir-1	FBgn0043841	-0.841891	-0.133678		mahe	FBgn0029979	0.553113	0.214007
															CG30460	FBgn0050460	-0.526095	-0.19695		14-3-3zeta	FBgn0004907	0.552972	0.136699
															ClC-a	FBgn0051116	-0.770098	-0.187747		pho	FBgn0002521	0.548605	0.148167
															CG31872	FBgn0051872	-1.15615	-0.900819		Rab8	FBgn0262518	0.542368	0.169304
															zormin	FBgn0052311	-0.506031	-0.559389		CG42346	FBgn0259677	0.536317	0.149377
															CG33143	FBgn0053143	-0.457401	-0.0631025		fax	FBgn0014163	0.536293	0.254348
															form3	FBgn0053556	-0.56752	-0.0852149		para	FBgn0264255	0.536033	0.0792881
															LpR1	FBgn0066101	-1.17432	-0.444318		Rdl	FBgn0004244	0.532784	0.0770186
															CG34120	FBgn0083956	-0.677919	-0.0129541		spab	FBgn0033358	0.532685	0.189757
															CG34408	FBgn0085437	-0.844381	-0.184742		klg	FBgn0017590	0.530163	0.13298
															ALiX	FBgn0086346	-0.80985	-0.0861793		sqd	FBgn0263396	0.526919	0.165131
															Desat1	FBgn0086687	-0.684591	0.158019		toy	FBgn0019650	0.526039	0.0544735
															sls	FBgn0086906	-0.510673	-0.437751		nmo	FBgn0011817	0.522268	0.146222
															Karybeta3	FBgn0087013	-0.475354	-0.22657		CG8405	FBgn0034071	0.51959	0.124545
															Chchd2	FBgn0260747	-0.500734	-0.0425809		CG42324	FBgn0259224	0.519546	0.21377
															yata	FBgn0260990	-0.553215	-0.20948		nrv3	FBgn0032946	0.516993	0.12056
															SREBP	FBgn0261283	-0.836625	-0.157861		Syt1	FBgn0004242	0.512582	0.0842406
															tobi	FBgn0261575	-1.33053	0.250419		CHES-1-like	FBgn0029504	0.512321	0.101689
															Sik3	FBgn0262103	-0.481527	-0.133323		bru3	FBgn0264001	0.509791	0.0116745
															Sec24CD	FBgn0262126	-0.643675	-0.141369		CG6765	FBgn0035903	0.505812	-0.0808441
															VhaAC45	FBgn0262515	-0.835925	-0.400298		nAChRbeta1	FBgn0000038	0.504843	0.127237
															Mdh1	FBgn0262782	-0.799675	0.0221824		CG12054	FBgn0039831	0.502646	0.162368
															Lpin	FBgn0263593	-0.442916	-0.210426		ssx	FBgn0024987	0.501677	0.0528186
															CG17646	FBgn0264494	-0.99232	-0.362584		dl	FBgn0260632	0.499299	-0.150082
															Mhc	FBgn0264695	-0.65657	-0.794012		Cngl	FBgn0263257	0.496202	0.0845169
															Strn-Mlck	FBgn0265045	-0.703759	-0.555202		fru	FBgn0004652	0.495886	-0.0226408
															Hsc70-4	FBgn0266599	-0.804443	-0.289648		Sema1a	FBgn0011259	0.493492	0.0582584
															Svil	FBgn0266696	-0.426605	-0.243683		jim	FBgn0027339	0.491927	0.249428
															Esyt2	FBgn0266758	-0.581252	-0.217993		CG2186	FBgn0030243	0.490644	0.107857
															dop	FBgn0267390	-0.518891	-0.199775		Ace	FBgn0000024	0.483081	0.0868175
															AOX1	FBgn0267408	-0.979986	-0.113853		east	FBgn0261954	0.482526	0.108953
																				ome	FBgn0259175	0.479333	0.0192638
																				dati	FBgn0262636	0.477169	0.121277
																				pros	FBgn0004595	0.475649	0.145075
																				eIF4EHP	FBgn0053100	0.474323	0.0422425
																				dtn	FBgn0262730	0.471882	0.217088
																				CtBP	FBgn0020496	0.471325	0.168433
																				CG45049	FBgn0266409	0.471162	0.112909
																				CanA-14F	FBgn0030758	0.471138	0.19023
																				Bsg	FBgn0261822	0.47107	0.066585
																				brat	FBgn0010300	0.470231	0.0943996
																				lola	FBgn0005630	0.467666	0.0770554
																				Ggamma30A	FBgn0267252	0.465005	0.205345
																				glec	FBgn0015229	0.464589	0.0811825
																				shep	FBgn0052423	0.463577	0.107786
																				robo1	FBgn0005631	0.463293	0.0661538
																				CG3198	FBgn0029887	0.46188	0.129018
																				porin	FBgn0004363	0.461025	0.0411997
																				Jarid2	FBgn0036004	0.460284	0.147425
																				unk	FBgn0004395	0.45922	0.0374559
																				CG3061	FBgn0038195	0.458266	0.220136
																				mub	FBgn0262737	0.457912	0.174725
																				Tlk	FBgn0086899	0.449156	0.134288
																				heph	FBgn0011224	0.446727	-0.0138904
																				Sap47	FBgn0013334	0.437053	0.097463
																				Set1	FBgn0040022	0.434675	0.153497
																				Pp2C1	FBgn0022768	0.434216	0.256408
																				nAChRalpha1	FBgn0000036	0.433863	0.0757615
																				Flo2	FBgn0264078	0.432904	-0.0268719
																				Corin	FBgn0033192	0.432822	0.11629
																				sgg	FBgn0003371	0.431987	0.164248
																				nej	FBgn0261617	0.427525	0.205479
																				Pka-R2	FBgn0022382	0.4268	0.176775
																				Rim	FBgn0053547	0.425077	-0.00983293
																				PlexA	FBgn0025741	0.417605	0.0653319
																				Ih	FBgn0263397	0.414839	0.144166
																				CG11319	FBgn0031835	0.412324	-0.00476303
																				Sytalpha	FBgn0261089	0.411326	0.066582
																				l(3)neo38	FBgn0265276	0.410808	0.161898
																				dikar	FBgn0261934	0.408143	0.102207
																				cpx	FBgn0041605	0.407881	0.0703551
																				sNPF	FBgn0032840	0.406029	0.0229185
																				Cow	FBgn0039054	0.404299	0.075916
																				brp	FBgn0259246	0.403051	0.0708393
																				cac	FBgn0263111	0.402397	-0.0388919
																				stau	FBgn0003520	0.40171	0.247226
																				PIP4K	FBgn0039924	0.397825	-0.0733756
																				GATAd	FBgn0032223	0.395903	0.13567
																				Ca-beta	FBgn0259822	0.39189	0.0617802
																				Rbp	FBgn0262483	0.391146	0.00330786
																				Cadps	FBgn0053653	0.390511	-0.00399719
																				Mid1	FBgn0053988	0.390381	0.102714
																				dlg1	FBgn0001624	0.389802	-0.0169706
																				Oamb	FBgn0024944	0.389492	0.0562172
																				Sap130	FBgn0262714	0.343183	-0.0886619
